# Supplementary material for: New Cladiellin-Type Diterpenoids from the South China Sea Soft Coral Cladiella krempfi: Structures and Molecular Docking Analysis in EGFRs
Source: MDPI journal article supplement (doi:10.3390/md20060381), 2022-06-07
Supplement: s1 [file s1]

# New Cladiellin-type Diterpenoids from the South China Sea Soft Coral *Cladiella krempfi*: Structures and Molecular Docking analysis in EGFRs

Yang Jin,<sup>1,3</sup> Li-Gong Yao,<sup>2,3</sup> Yue-Wei Guo<sup>1,2,3,\*</sup> Xu-Wen Li<sup>1,2,3,\*</sup>

<sup>1</sup> School of Chinese Materia Medica, Nanjing University of Chinese Medicine, 210023 Nanjing, China

<sup>2</sup> Drug Discovery Shandong Laboratory, Bohai Rim Advanced Research Institute for Drug Discovery, Yantai, 264117, China

<sup>3</sup> State Key Laboratory of Drug Research, Shanghai Institute of Materia Medica, Chinese Academy of Sciences, 555 Zu Chong Zhi Road, Zhangjiang Hi-Tech Park, Shanghai 201203, China

\* Corresponding authors: ywguo@sim.ac.cn (Y.-W.G.); xwli@sim.ac.cn (X.-W.L.); Tel.: +86-21-50806600-3317 (X.-W.L.)

## Table of Contents

|                                                                                                                          |    |
|--------------------------------------------------------------------------------------------------------------------------|----|
| <b>Table S1.</b> EGFR inhibitory data of compounds <b>1-6</b> and the positive control staurosporine.....                | 4  |
| <b>Table S2.</b> In silico docking parameters between compounds <b>2-6</b> and the ligand of 7XO site of 5X2A.....       | 4  |
| <b>Figure S1.</b> <sup>1</sup> H NMR spectrum of compound <b>1</b> (600 MHz, CDCl <sub>3</sub> ).....                    | 5  |
| <b>Figure S2.</b> <sup>13</sup> C NMR spectrum of compound <b>1</b> (125 MHz, CDCl <sub>3</sub> ) .....                  | 5  |
| <b>Figure S3.</b> DEPT135 spectrum of compound <b>1</b> (125 MHz, CDCl <sub>3</sub> ) .....                              | 6  |
| <b>Figure S4.</b> HSQC spectrum of compound <b>1</b> (600 MHz, CDCl <sub>3</sub> ) .....                                 | 6  |
| <b>Figure S5.</b> <sup>1</sup> H- <sup>1</sup> H COSY spectrum of compound <b>1</b> (600 MHz, CDCl <sub>3</sub> ) .....  | 7  |
| <b>Figure S6.</b> HMBC spectrum of compound <b>1</b> (600 MHz, CDCl <sub>3</sub> ) .....                                 | 7  |
| <b>Figure S7.</b> NOESY spectrum of compound <b>1</b> (600 MHz, CDCl <sub>3</sub> ) .....                                | 8  |
| <b>Figure S8.</b> HR-ESI-MS spectrum of compound <b>1</b> .....                                                          | 8  |
| <b>Figure S9.</b> IR spectrum of compound <b>1</b> .....                                                                 | 9  |
| <b>Figure S10.</b> ORD spectrum of compound <b>1</b> .....                                                               | 9  |
| <b>Figure S11.</b> <sup>1</sup> H NMR spectrum of compound <b>2</b> (600 MHz, CDCl <sub>3</sub> ) .....                  | 10 |
| <b>Figure S12.</b> <sup>13</sup> C NMR spectrum of compound <b>2</b> (125 MHz, CDCl <sub>3</sub> ) .....                 | 10 |
| <b>Figure S13.</b> DEPT135 spectrum of compound <b>2</b> (125 MHz, CDCl <sub>3</sub> ) .....                             | 11 |
| <b>Figure S14.</b> HSQC spectrum of compound <b>2</b> (600 MHz, CDCl <sub>3</sub> ) .....                                | 11 |
| <b>Figure S15.</b> <sup>1</sup> H- <sup>1</sup> H COSY spectrum of compound <b>2</b> (600 MHz, CDCl <sub>3</sub> ) ..... | 12 |
| <b>Figure S16.</b> HMBC spectrum of compound <b>2</b> (600 MHz, CDCl <sub>3</sub> ) .....                                | 12 |
| <b>Figure S17.</b> NOESY spectrum of compound <b>2</b> (600 MHz, CDCl <sub>3</sub> ) .....                               | 13 |
| <b>Figure S18.</b> HR-ESI-MS spectrum of compound <b>2</b> .....                                                         | 13 |
| <b>Figure S19.</b> IR spectrum of compound <b>2</b> .....                                                                | 14 |
| <b>Figure S20.</b> ORD spectrum of compound <b>2</b> .....                                                               | 14 |
| <b>Figure S21.</b> <sup>1</sup> H NMR spectrum of compound <b>3</b> (400 MHz, CDCl <sub>3</sub> ) .....                  | 15 |
| <b>Figure S22.</b> <sup>13</sup> C NMR spectrum of compound <b>3</b> (125 MHz, CDCl <sub>3</sub> ) .....                 | 15 |
| <b>Figure S23.</b> <sup>1</sup> H NMR spectrum of compound <b>4</b> (400 MHz, CDCl <sub>3</sub> ) .....                  | 16 |
| <b>Figure S24.</b> <sup>13</sup> C NMR spectrum of compound <b>4</b> (125 MHz, CDCl <sub>3</sub> ) .....                 | 16 |
| <b>Figure S25.</b> <sup>1</sup> H NMR spectrum of compound <b>5</b> (500 MHz, CDCl <sub>3</sub> ) .....                  | 17 |
| <b>Figure S26.</b> <sup>13</sup> C NMR spectrum of compound <b>5</b> (125 MHz, CDCl <sub>3</sub> ) .....                 | 17 |
| <b>Figure S27.</b> <sup>1</sup> H NMR spectrum of compound <b>6</b> (500 MHz, CDCl <sub>3</sub> ) .....                  | 18 |
| <b>Figure S28.</b> <sup>13</sup> C NMR spectrum of compound <b>6</b> (125 MHz, CDCl <sub>3</sub> ) .....                 | 18 |
| <b>Figure S29.</b> <sup>13</sup> H NMR spectrum of mixture (600 MHz, CDCl <sub>3</sub> ) .....                           | 19 |

|                                                                                                              |    |
|--------------------------------------------------------------------------------------------------------------|----|
| <b>Figure S30.</b> HR-ESI-MS spectrum of mixture.....                                                        | 19 |
| <b>Figure S31.</b> In silico binding mode of compounds <b>2-6</b> at EGFR kinase crystal structure 5X2A..... | 20 |

**Table S1.** EGFR inhibitory data of compounds **1–6** and the positive control staurosporine.

| Compound ID   | Concentration (nM) | Mean                       | SD  |
|---------------|--------------------|----------------------------|-----|
| <b>1</b>      | 20000              | -9.9                       | 4.5 |
| <b>2</b>      | 20000              | -12.5                      | 4.2 |
| <b>3</b>      | 20000              | -3.8                       | 5.3 |
| <b>4</b>      | 20000              | -3.4                       | 5.8 |
| <b>5</b>      | 20000              | -7.5                       | 3.1 |
| <b>6</b>      | 20000              | -4.9                       | 3.7 |
| Staurosporine |                    | IC <sub>50</sub> = 82.3 nM |     |

**Table S2.** In silico docking parameters between compounds **2-6** and the ligand of 7XO site of 5X2A

| EGFR crystal structure | Compound ID | Number of hydrogen bonds | Binding Energy (kcal mol <sup>-1</sup> ) | Van der Waals Energy (kcal mol <sup>-1</sup> ) | -CDOCKER ENERGY (kcal mol <sup>-1</sup> ) | -CDOCKER INTERACTION ENERGY (kcal mol <sup>-1</sup> ) |
|------------------------|-------------|--------------------------|------------------------------------------|------------------------------------------------|-------------------------------------------|-------------------------------------------------------|
| 5X2A                   | <b>2</b>    | 3                        | 3.57                                     | -19.62                                         | -21.53                                    | 56.27                                                 |
|                        | <b>3</b>    | 1                        | 1.83                                     | -13.54                                         | -28.67                                    | 47.16                                                 |
|                        | <b>4</b>    | 3                        | 0.13                                     | -14.00                                         | -24.37                                    | 55.77                                                 |
|                        | <b>5</b>    | 1                        | 8.52                                     | -15.53                                         | -25.47                                    | 54.58                                                 |
|                        | <b>6</b>    | 2                        | 3.72                                     | -14.21                                         | -30.33                                    | 49.82                                                 |

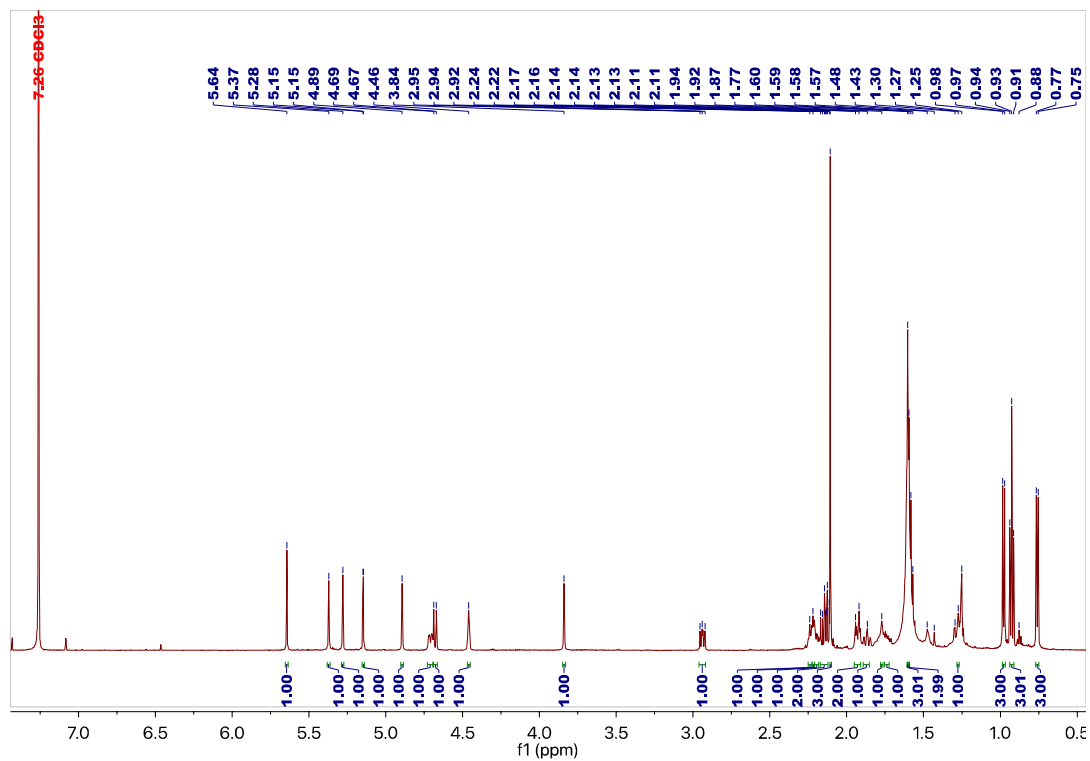

**Figure S1.** <sup>1</sup>H NMR spectrum of compound **1** in CDCl<sub>3</sub>

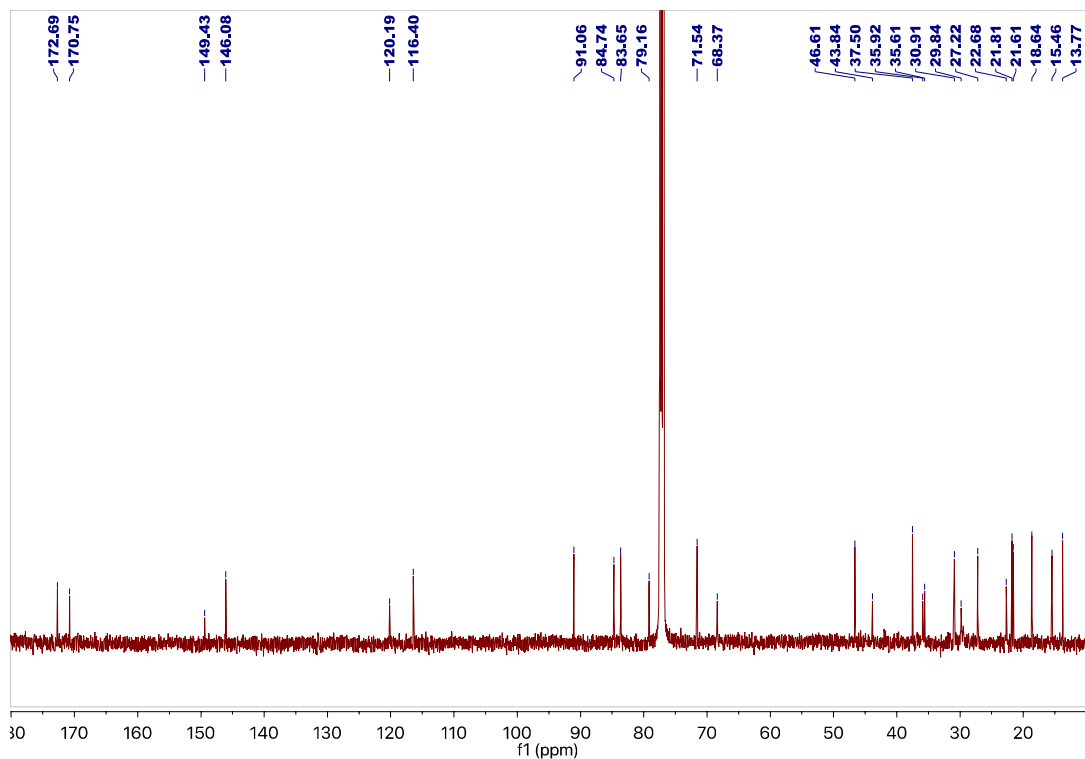

**Figure S2.** <sup>13</sup>C NMR spectrum of compound **1** in CDCl<sub>3</sub>

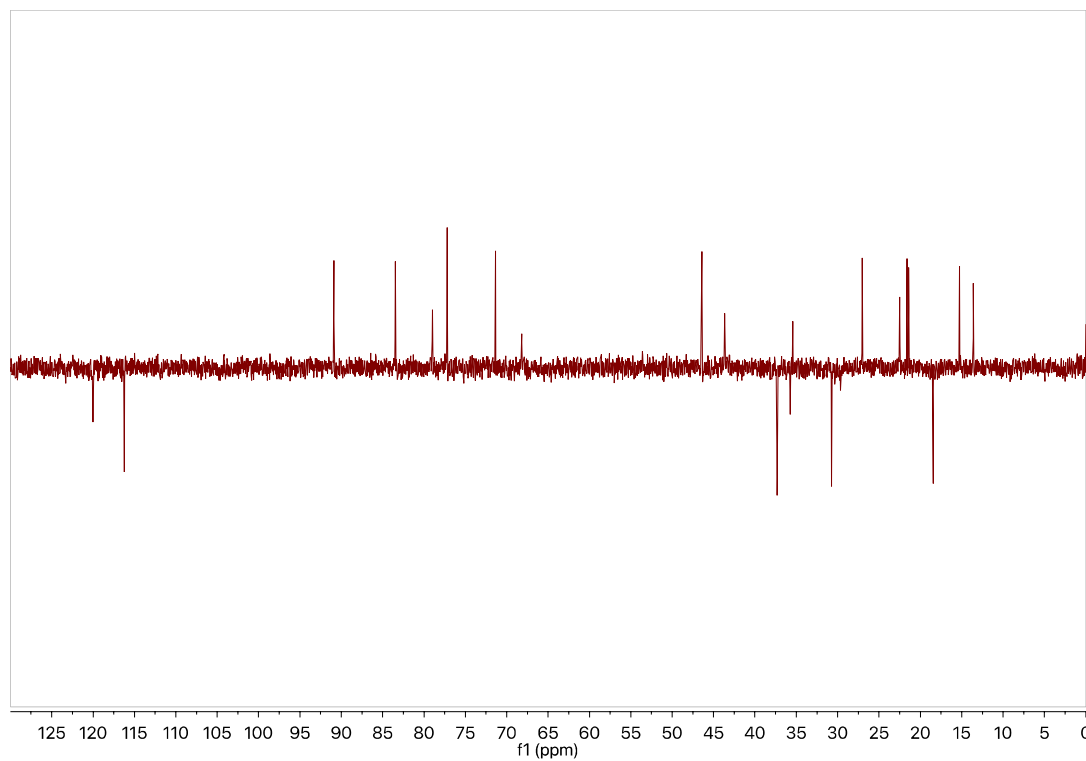

**Figure S3.** DEPT135 spectrum of compound **1** in  $\text{CDCl}_3$

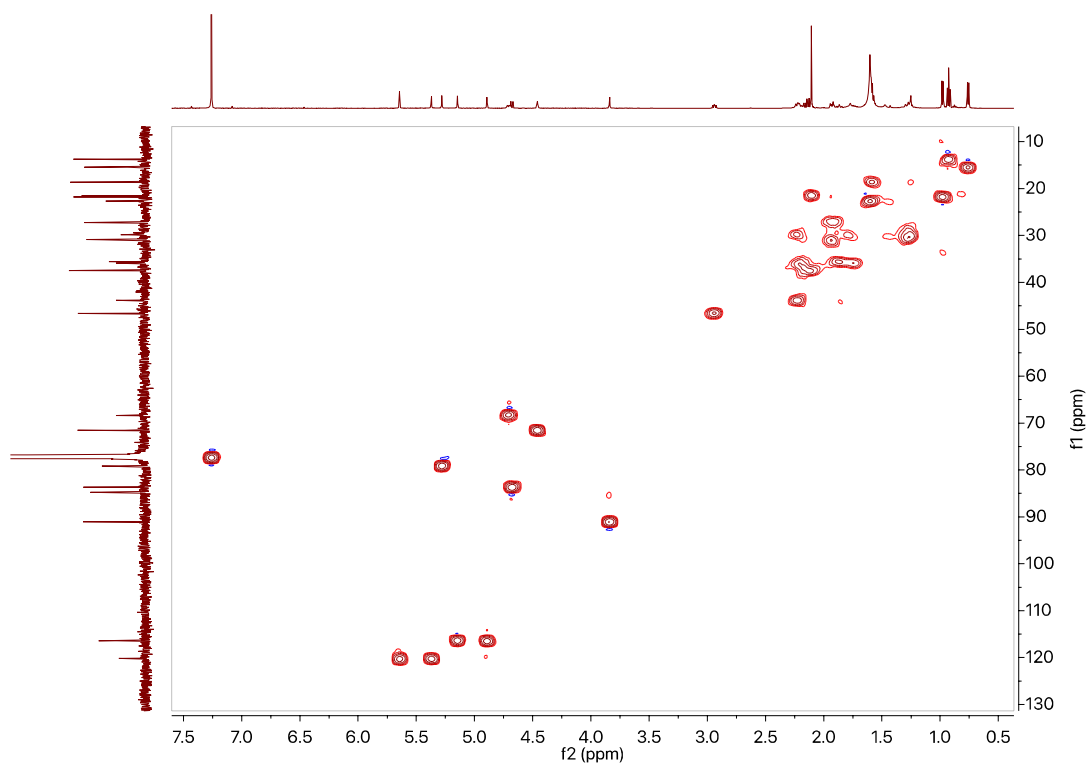

**Figure S4.** HSQC spectrum of compound **1** in  $\text{CDCl}_3$

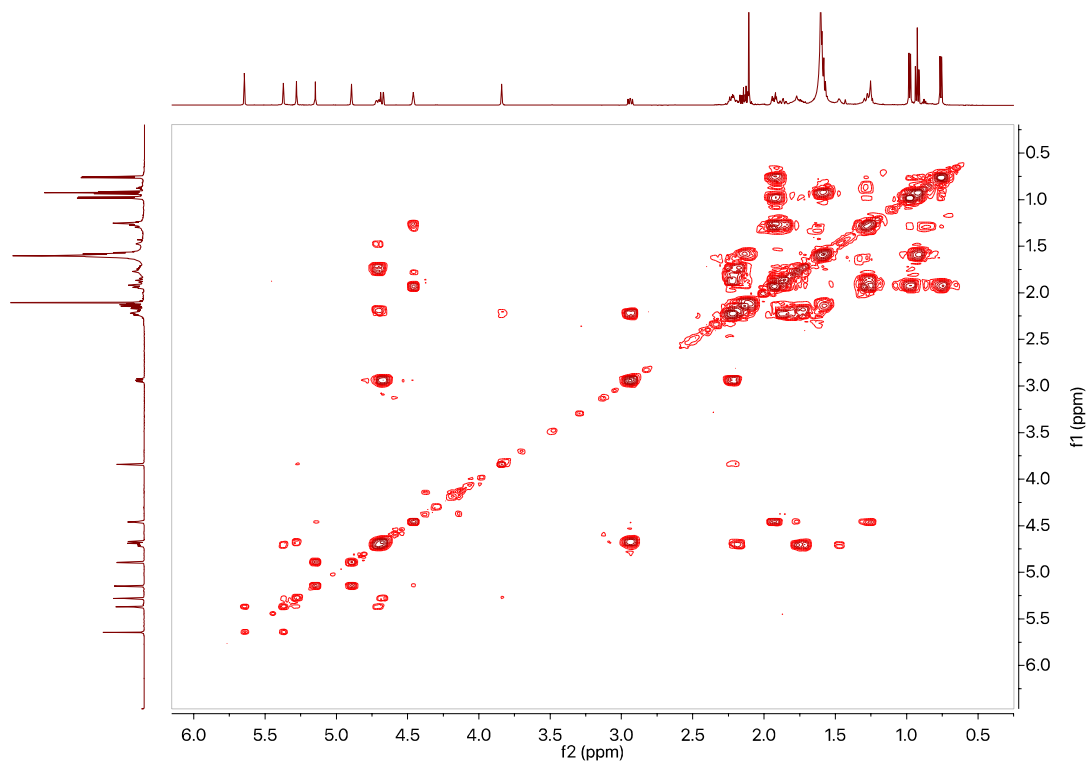

**Figure S5.**  $^1\text{H}$ - $^1\text{H}$  COSY spectrum of compound **1** in  $\text{CDCl}_3$

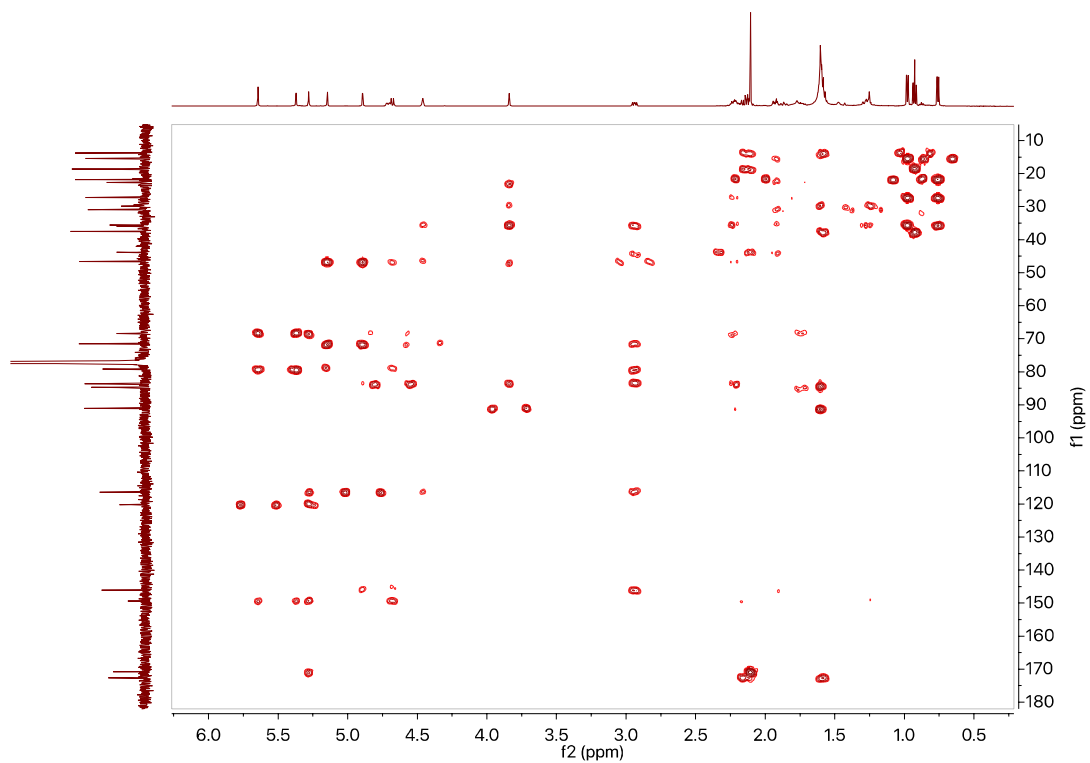

**Figure S6.** HMBC spectrum of compound **1** in  $\text{CDCl}_3$

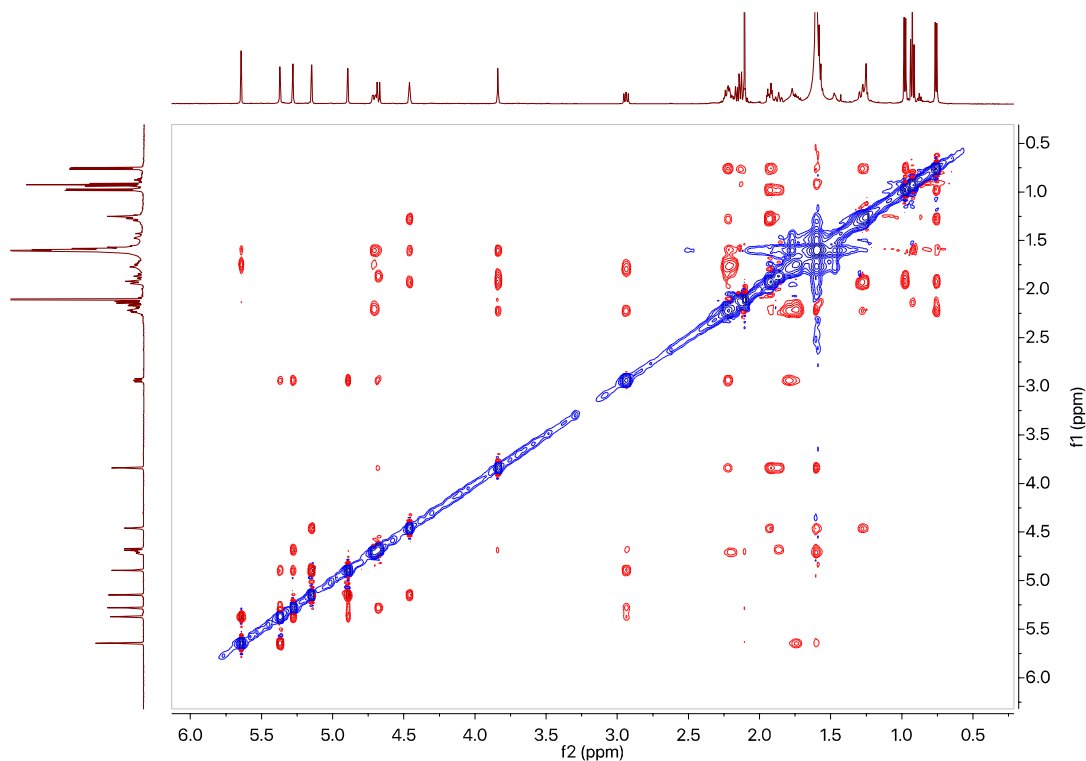

Figure S7. NOESY spectrum of compound **1** in  $\text{CDCl}_3$

#### Qualitative Analysis Report

|                        |                                        |                               |                             |
|------------------------|----------------------------------------|-------------------------------|-----------------------------|
| <b>Data Filename</b>   | ESIH202103259.d                        | <b>Sample Name</b>            | A8-A8-E3B                   |
| <b>Sample ID</b>       |                                        | <b>Position</b>               | P1-E3                       |
| <b>Instrument Name</b> | Agilent G6520 Q-TOF                    | <b>Acq Method</b>             | 20160322_MS_ESIH_POS_1min.m |
| <b>Acquired Time</b>   | 7/1/2021 19:56:48                      | <b>IRM Calibration Status</b> | Success                     |
| <b>DA Method</b>       | small molecular data analysis method.m | <b>Comment</b>                | ESIH by zhuzhenyun          |

#### User Spectra

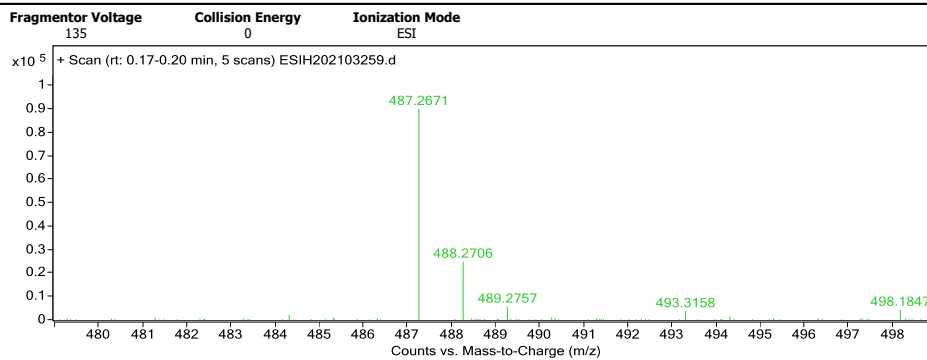

#### Formula Calculator Results

| m/z      | Calc m/z | Diff (mDa) | Diff (ppm) | Ion Formula                                      | Ion                 |
|----------|----------|------------|------------|--------------------------------------------------|---------------------|
| 487.2671 | 487.2666 | -0.47      | -0.97      | C <sub>26</sub> H <sub>40</sub> NaO <sub>7</sub> | (M+Na) <sup>+</sup> |

--- End Of Report ---

Figure S8. HR-ESI-MS spectrum of compound **1**



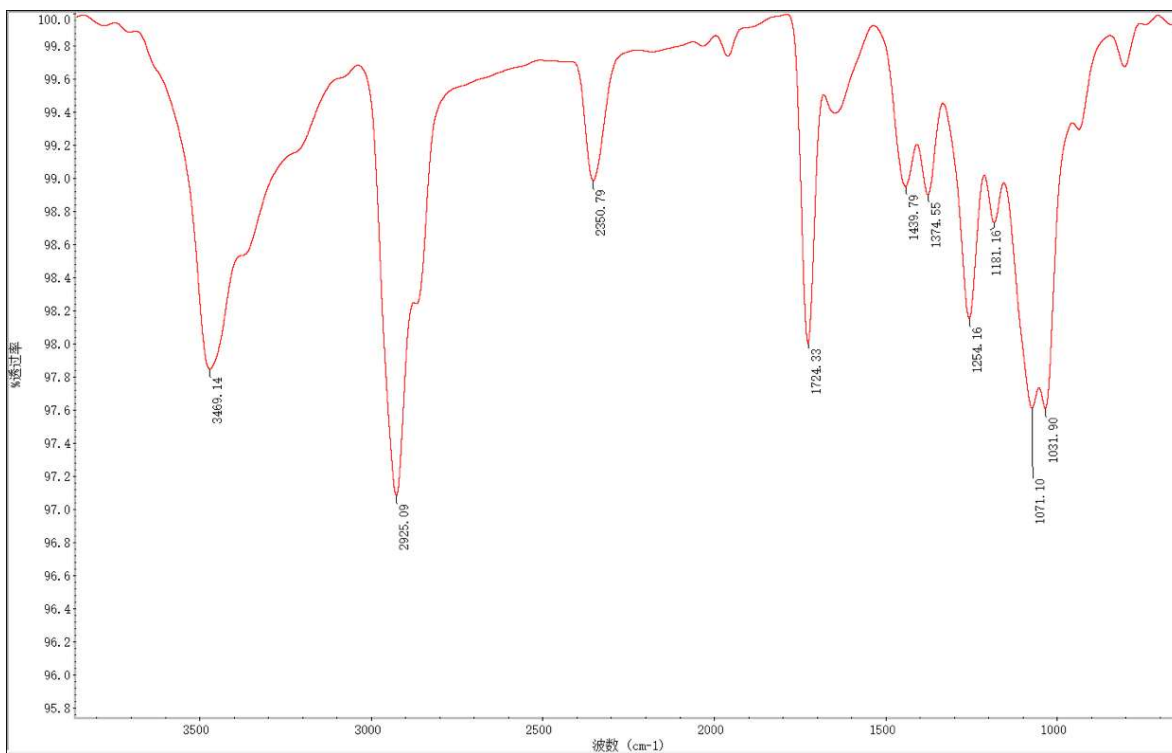

Figure S9. IR spectrum of compound 1

day, 06/28/2021

sample was measured on an Autopol VI, serial number 901

manufactured by Rudolph Research Analytical, Hackettstown, NJ

) : E3B-2

Temperature : OFF

p Corr : OFF

Average

24.881

Std.Dev.

2.9282

| Sample ID | Time        | Result |
|-----------|-------------|--------|
| E3B-2     | 06:56:36 PM | 23.571 |
| E3B-2     | 06:56:59 PM | 28.571 |
| E3B-2     | 06:57:10 PM | 23.571 |
| E3B-2     | 06:57:20 PM | 22.143 |
| E3B-2     | 06:57:27 PM | 22.143 |
| E3B-2     | 06:57:41 PM | 29.286 |

ature

Figure S10. ORD spectrum of compound 1

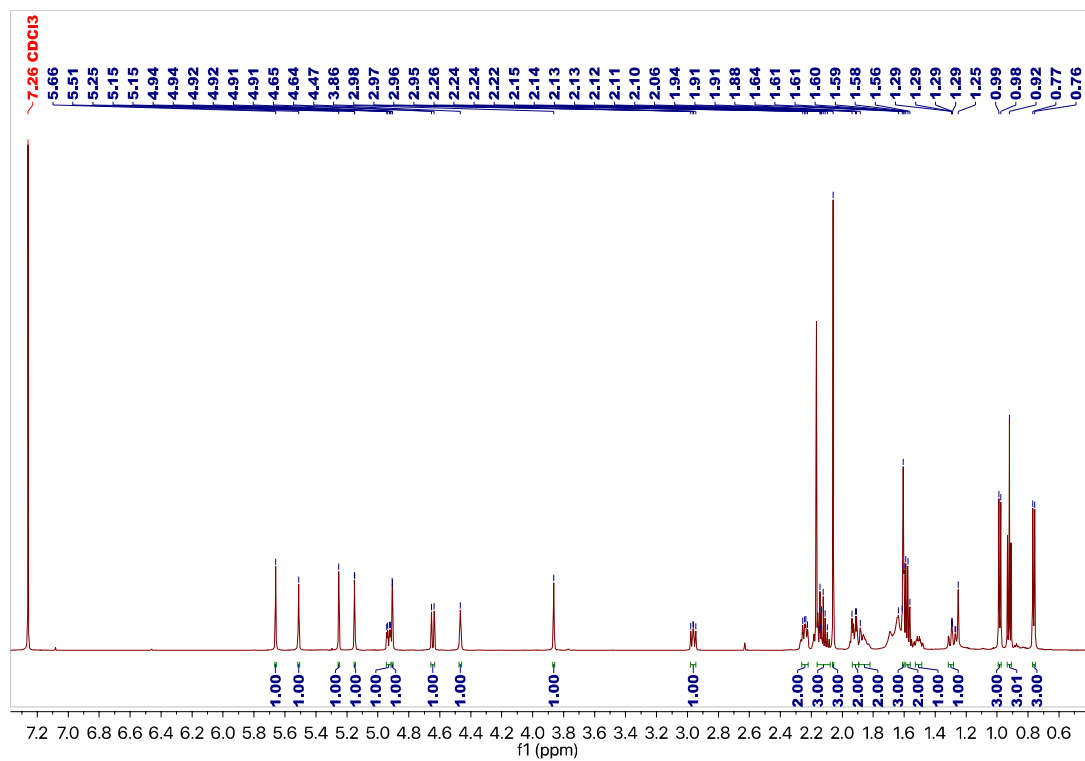

**Figure S11.**  $^1\text{H}$  NMR spectrum of compound **2** in  $\text{CDCl}_3$

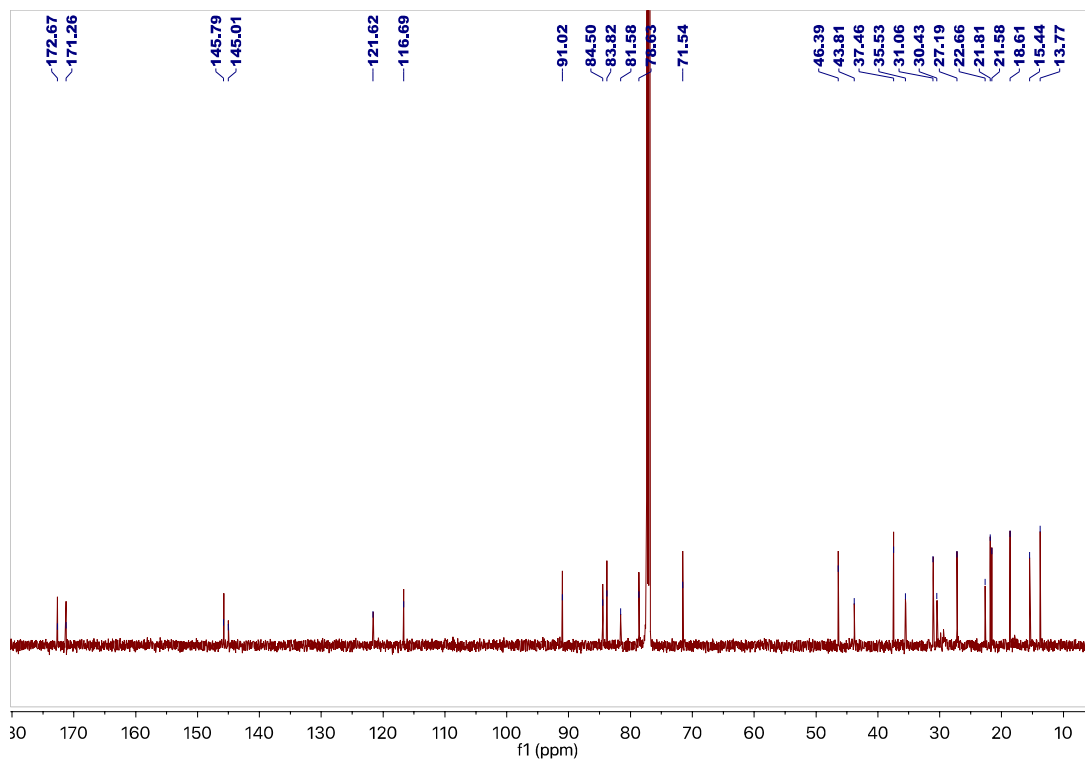

**Figure S12.**  $^{13}\text{C}$  NMR spectrum of compound **2** in  $\text{CDCl}_3$

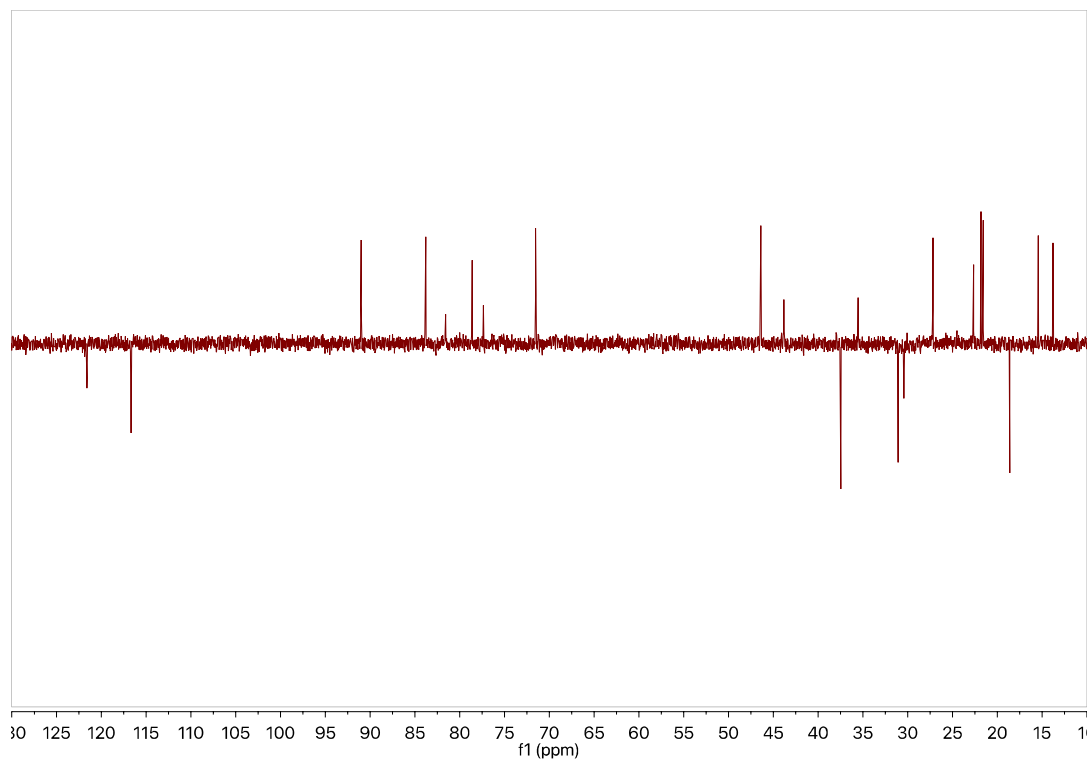

**Figure S13.** DEPT135 spectrum of compound **2** in  $\text{CDCl}_3$

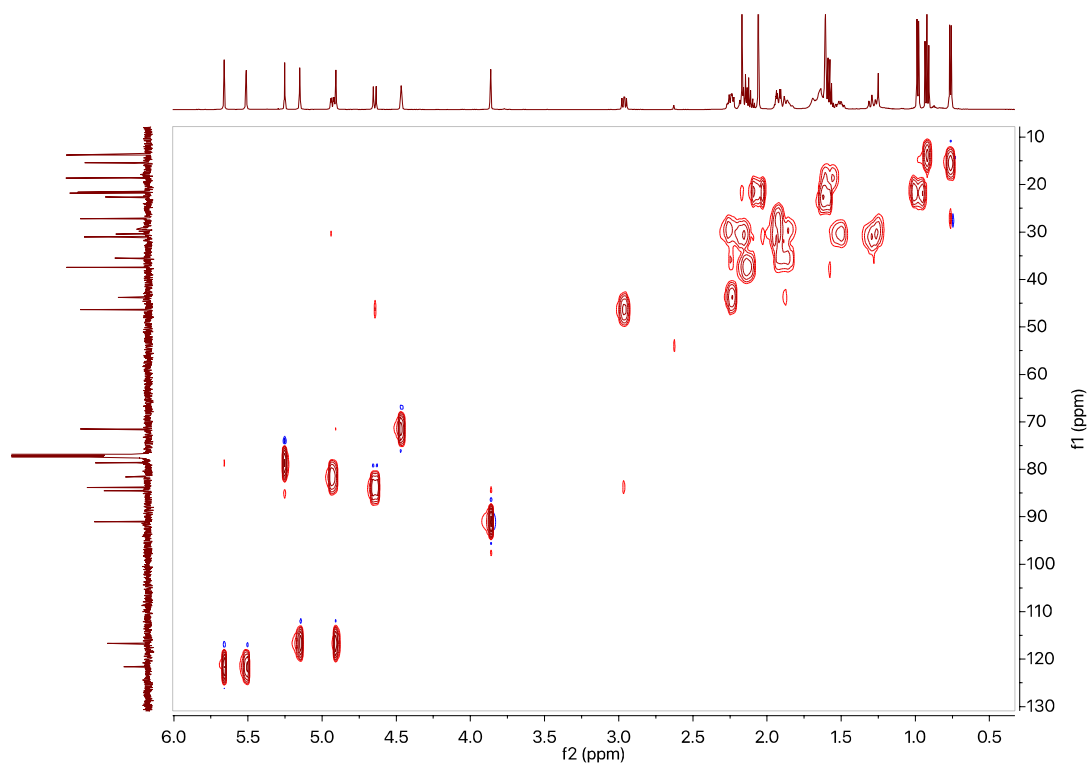

**Figure S14.** HSQC spectrum of compound **2** in  $\text{CDCl}_3$

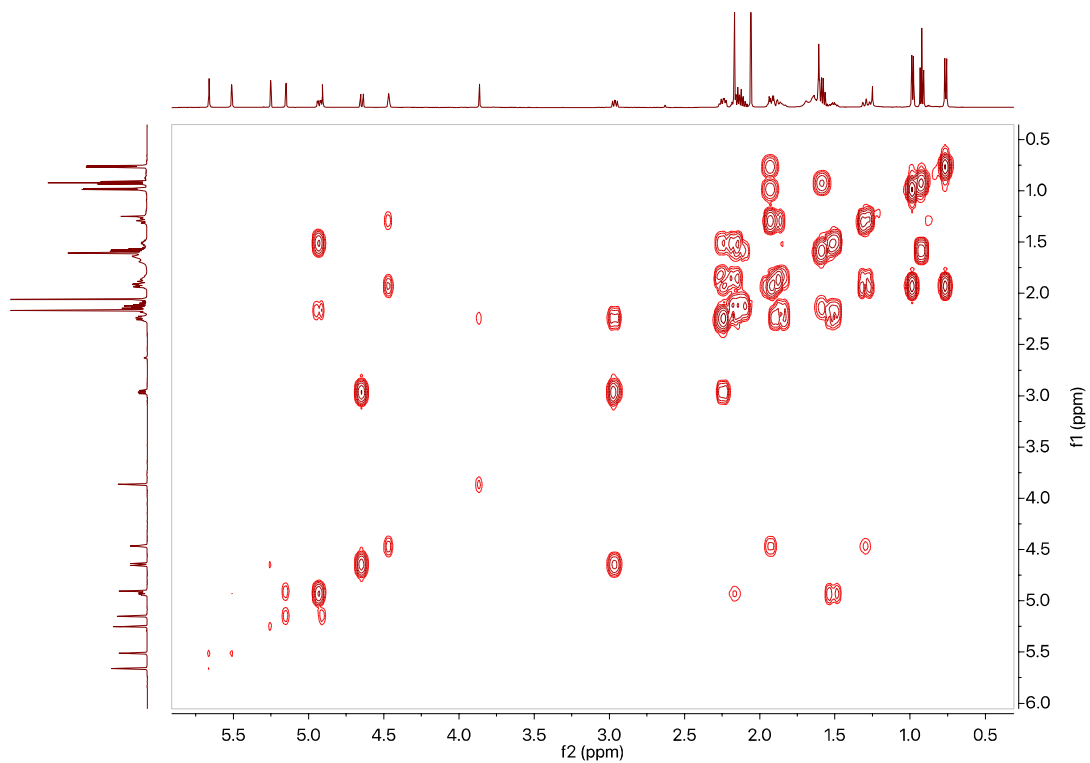

**Figure S15.**  $^1\text{H}$ - $^1\text{H}$  COSY spectrum of compound **2** in  $\text{CDCl}_3$

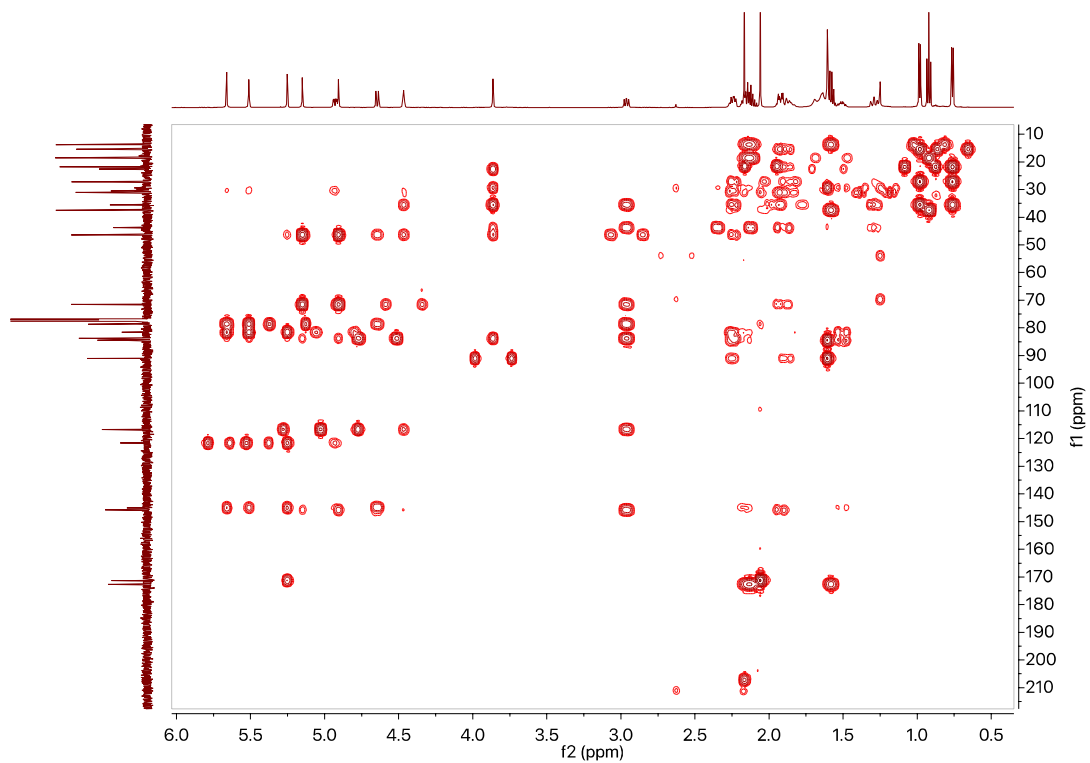

**Figure S16.** HMBC spectrum of compound **2** in  $\text{CDCl}_3$

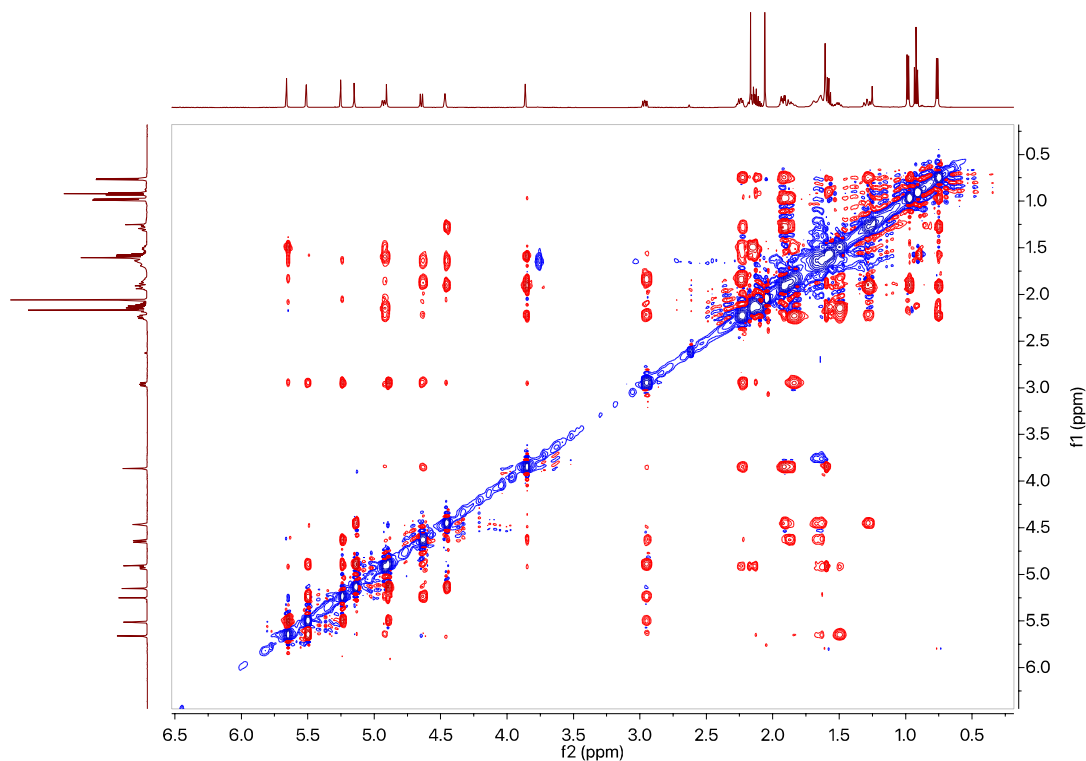

**Figure S17.** NOESY spectrum of compound **2** in  $\text{CDCl}_3$

### Qualitative Analysis Report

|                        |                                        |                               |                             |
|------------------------|----------------------------------------|-------------------------------|-----------------------------|
| <b>Data Filename</b>   | ESI202102821.d                         | <b>Sample Name</b>            | A8-A8-E4A                   |
| <b>Sample ID</b>       |                                        | <b>Position</b>               | P2-D2                       |
| <b>Instrument Name</b> | Agilent G6520 Q-TOF                    | <b>Acq Method</b>             | 20160322_MS_ESIH_POS_1min.m |
| <b>Acquired Time</b>   | 5/24/2021 17:23:13                     | <b>IRM Calibration Status</b> | Success                     |
| <b>DA Method</b>       | small molecular data analysis method.m | <b>Comment</b>                | ESI202102821.d              |

#### User Spectra

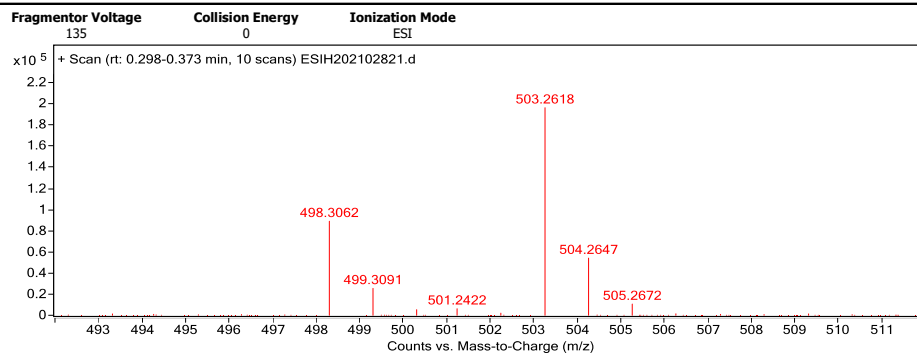

#### Formula Calculator Results

| m/z      | Calc m/z | Diff (mDa) | Diff (ppm) | Ion Formula                                                   | Ion                               |
|----------|----------|------------|------------|---------------------------------------------------------------|-----------------------------------|
| 503.2618 | 503.2615 | -0.31      | -0.62      | C <sub>26</sub> H <sub>40</sub> NaO <sub>8</sub>              | (M+Na) <sup>+</sup>               |
| 498.3062 | 498.3061 | -0.03      | -0.05      | C <sub>26</sub> H <sub>44</sub> N <sub>2</sub> O <sub>8</sub> | (M+NH <sub>4</sub> ) <sup>+</sup> |

--- End Of Report ---

**Figure S18.** HR-ESI-MS spectrum of compound **2**

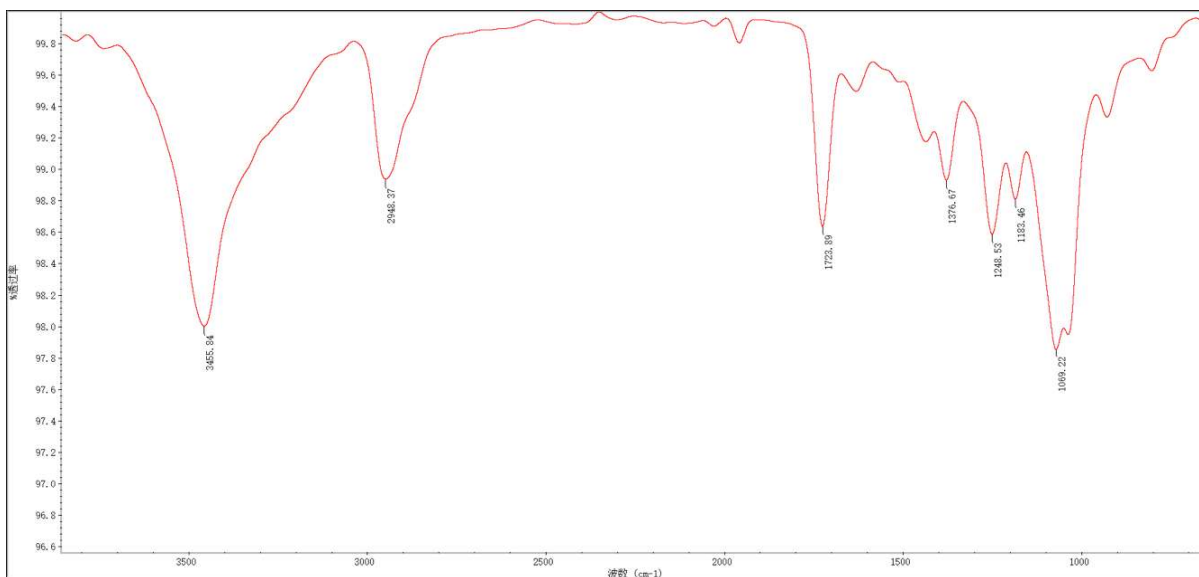

Figure S19. IR spectrum of compound 2

| Aulopu Research Analytical                                    |           |             |        |
|---------------------------------------------------------------|-----------|-------------|--------|
| Tuesday, 06/24/2021                                           |           |             |        |
| This sample was measured on an Aulopu VI, serial number 900   |           |             |        |
| manufactured by Rudolph Research Analytical Hackettstown, NJ. |           |             |        |
| ID : E4A                                                      |           |             |        |
| Temperature : OFF                                             |           |             |        |
| mp Corr : OFF                                                 |           |             |        |
| Average                                                       |           | StdDev.     |        |
| 15.790                                                        |           | 2.0434      |        |
| No                                                            | Sample ID | Time        | Result |
| E4A                                                           |           | 07:49:52 PM | 17.719 |
| E4A                                                           |           | 07:50:06 PM | 12.281 |
| E4A                                                           |           | 07:50:13 PM | 13.684 |
| E4A                                                           |           | 07:50:26 PM | 17.193 |
| E4A                                                           |           | 07:50:34 PM | 16.842 |
| E4A                                                           |           | 07:50:40 PM | 17.018 |
| nature                                                        |           |             |        |

Figure S20. ORD spectrum of compound 2

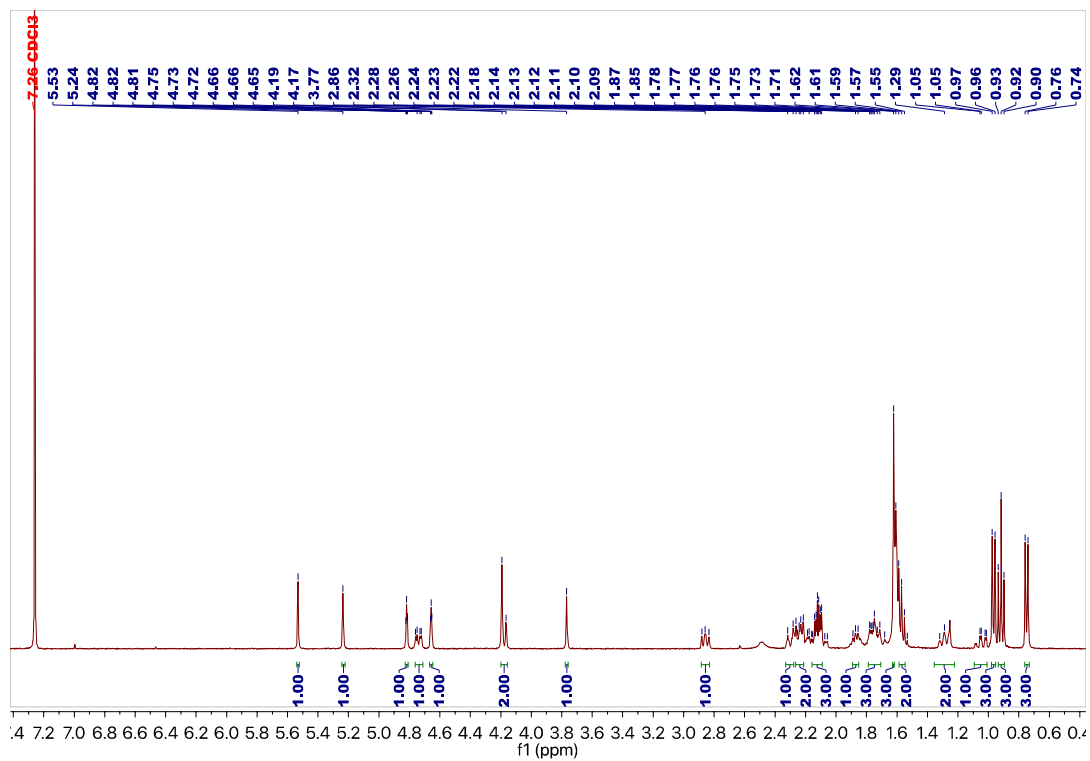

**Figure S21.** <sup>1</sup>H NMR spectrum of compound **3** in CDCl<sub>3</sub>

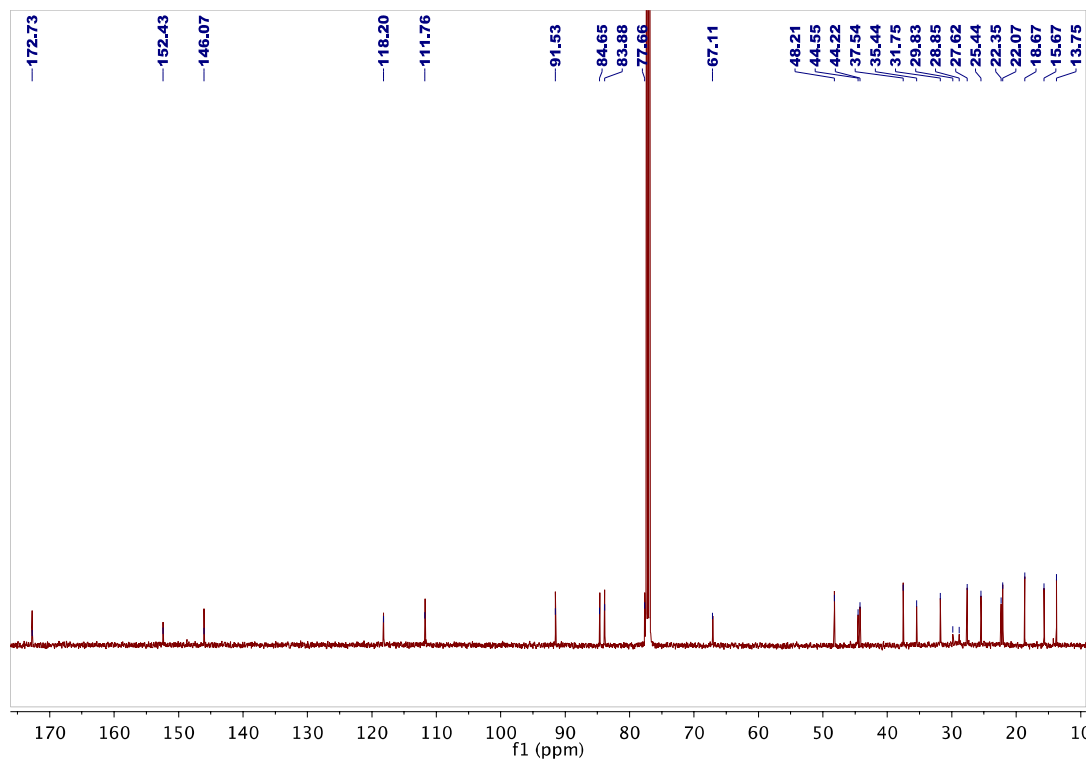

**Figure S22.** <sup>13</sup>C NMR spectrum of compound **3** in CDCl<sub>3</sub>

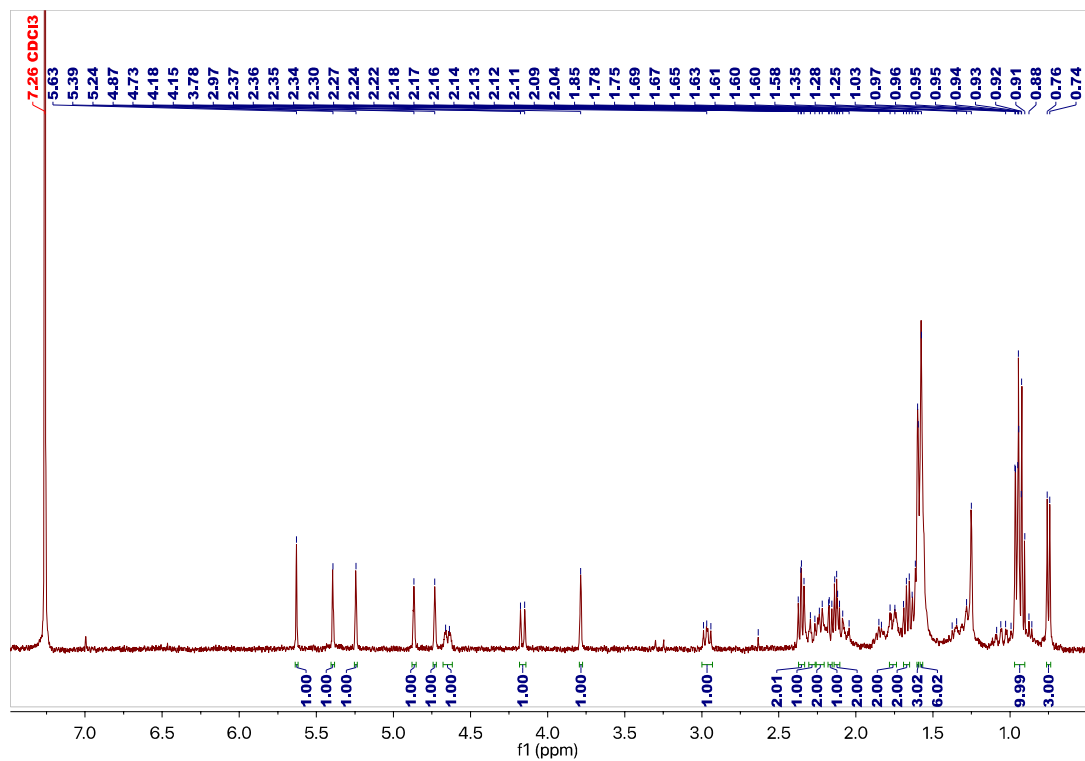

**Figure S23.** <sup>1</sup>H NMR spectrum of compound **4** in CDCl<sub>3</sub>

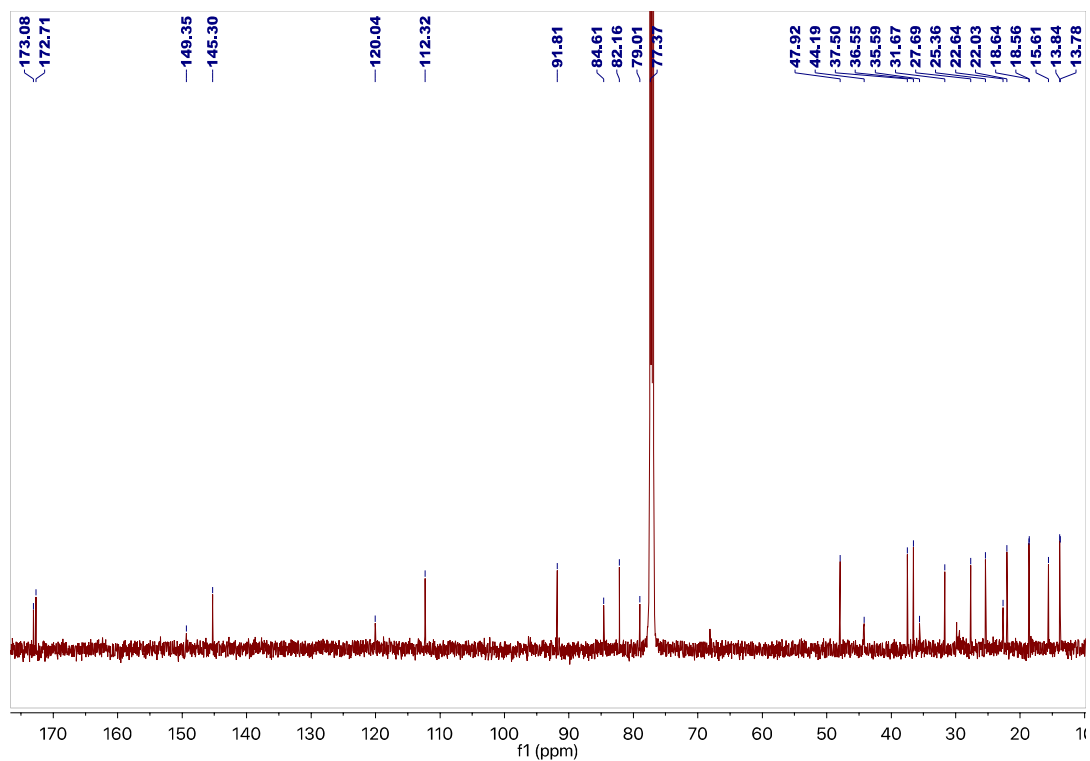

**Figure S24.** <sup>13</sup>C NMR spectrum of compound **4** in CDCl<sub>3</sub>



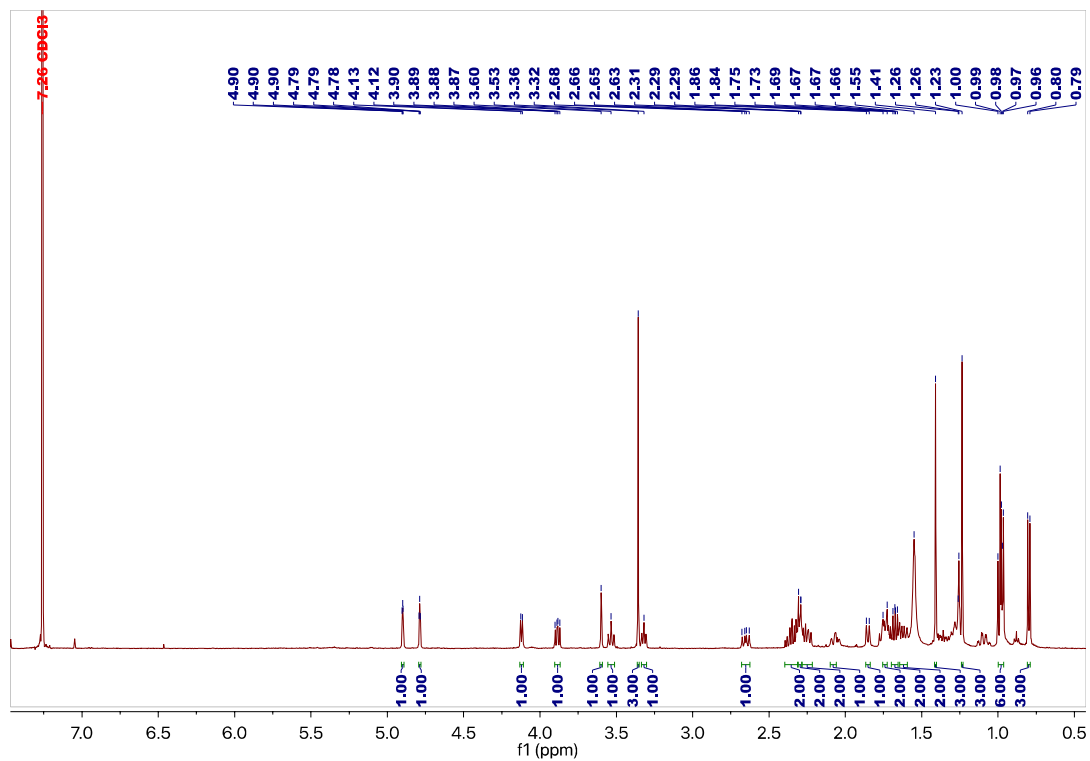

**Figure S25.** <sup>1</sup>H NMR spectrum of compound **5** in CDCl<sub>3</sub>

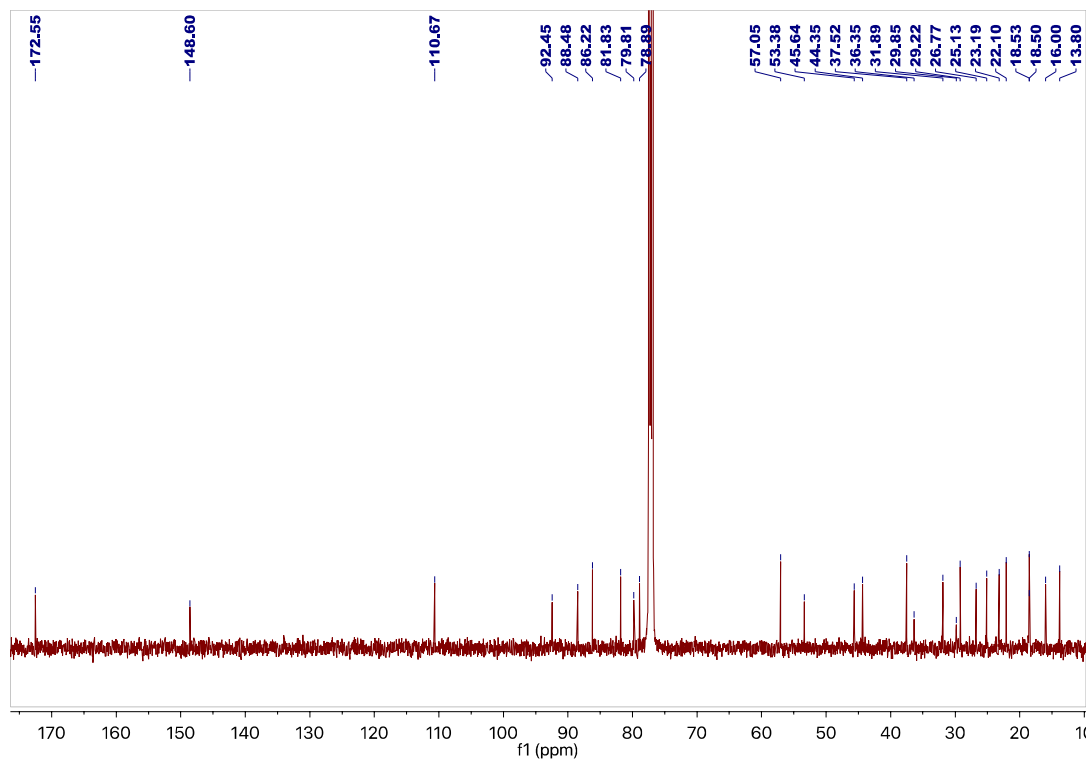

**Figure S26.** <sup>13</sup>C NMR spectrum of compound **5** in CDCl<sub>3</sub>

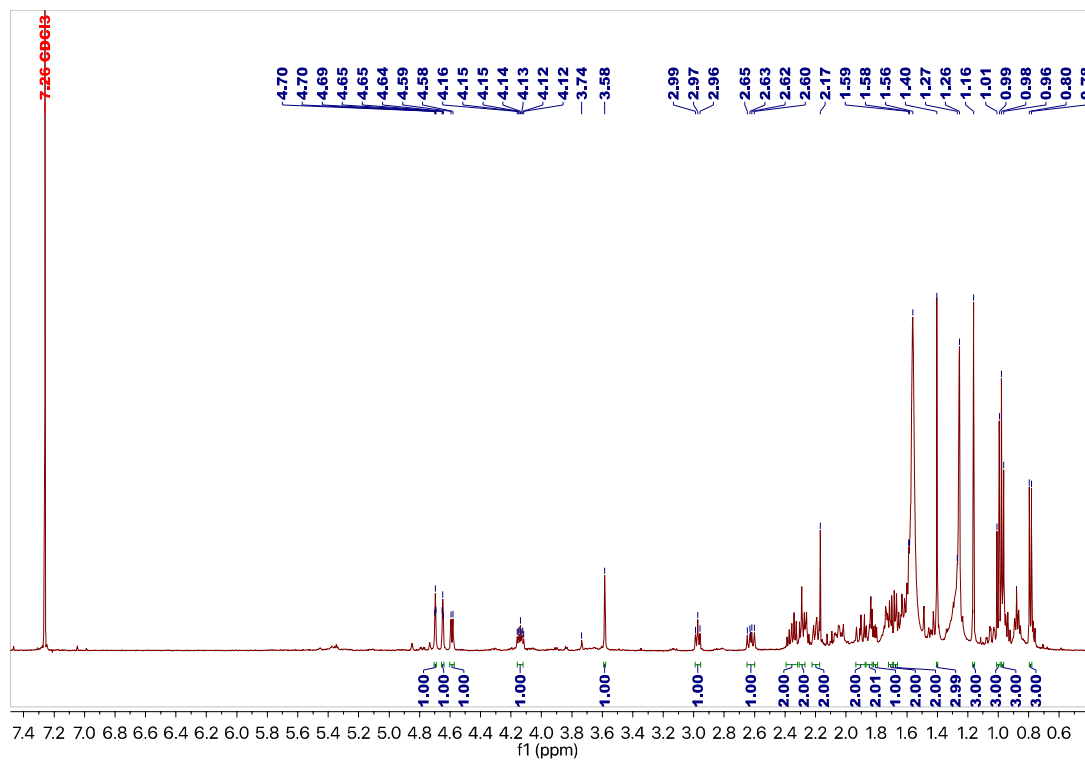

**Figure S27.** <sup>1</sup>H NMR spectrum of compound **6** in CDCl<sub>3</sub>

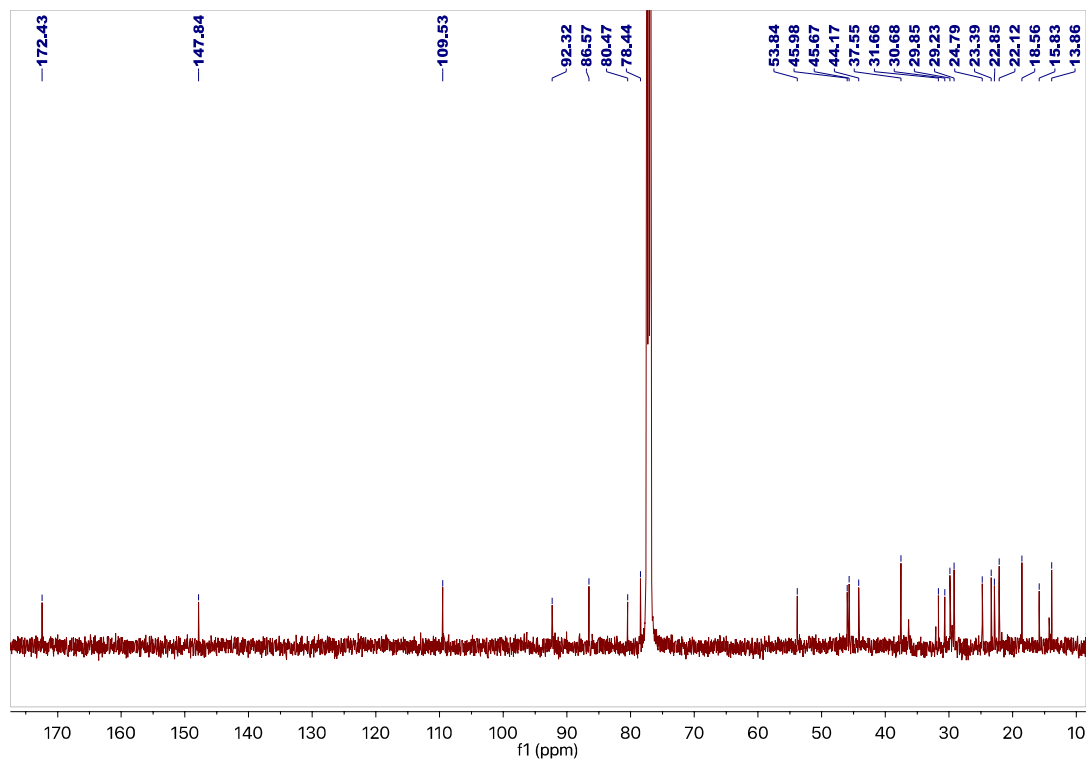

**Figure S28.** <sup>13</sup>C NMR spectrum of compound **6** in CDCl<sub>3</sub>

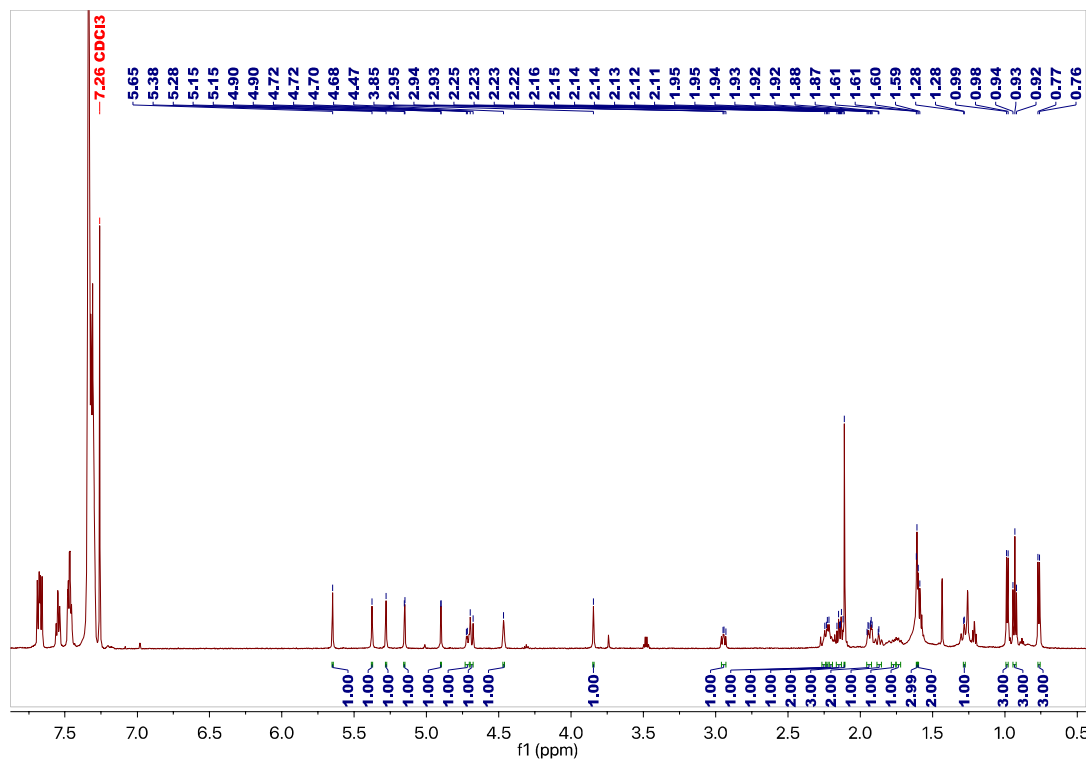

## Qualitative Analysis Report

|                        |                                        |                               |                             |
|------------------------|----------------------------------------|-------------------------------|-----------------------------|
| <b>Data Filename</b>   | ESIH202201014.d                        | <b>Sample Name</b>            | A8-A8-E4A0302               |
| <b>Sample ID</b>       |                                        | <b>Position</b>               | P1-B2                       |
| <b>Instrument Name</b> | Agilent G6520 Q-TOF                    | <b>Acq Method</b>             | 20160322_MS_ESIH_POS_1min.m |
| <b>Acquired Time</b>   | 3/2/2022 13:53:10                      | <b>IRM Calibration Status</b> | Success                     |
| <b>DA Method</b>       | small molecular data analysis method.m | <b>Comment</b>                | ESIH by fanasu              |

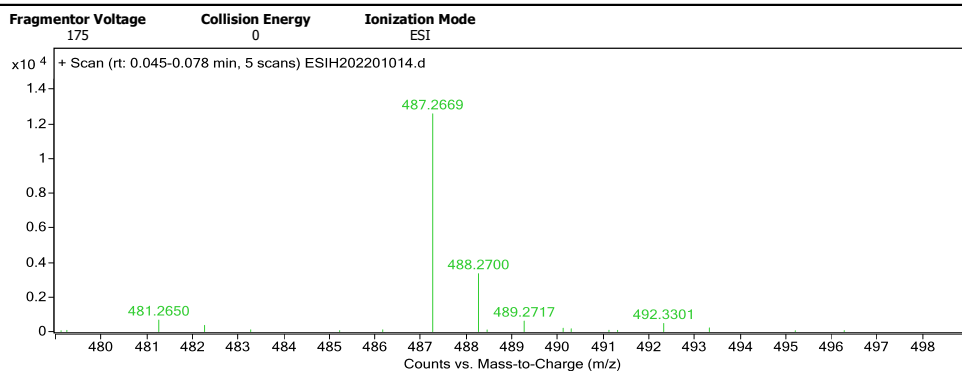

--- End Of Report ---

**Figure S30.** HR-ESI-MS spectrum of mixture

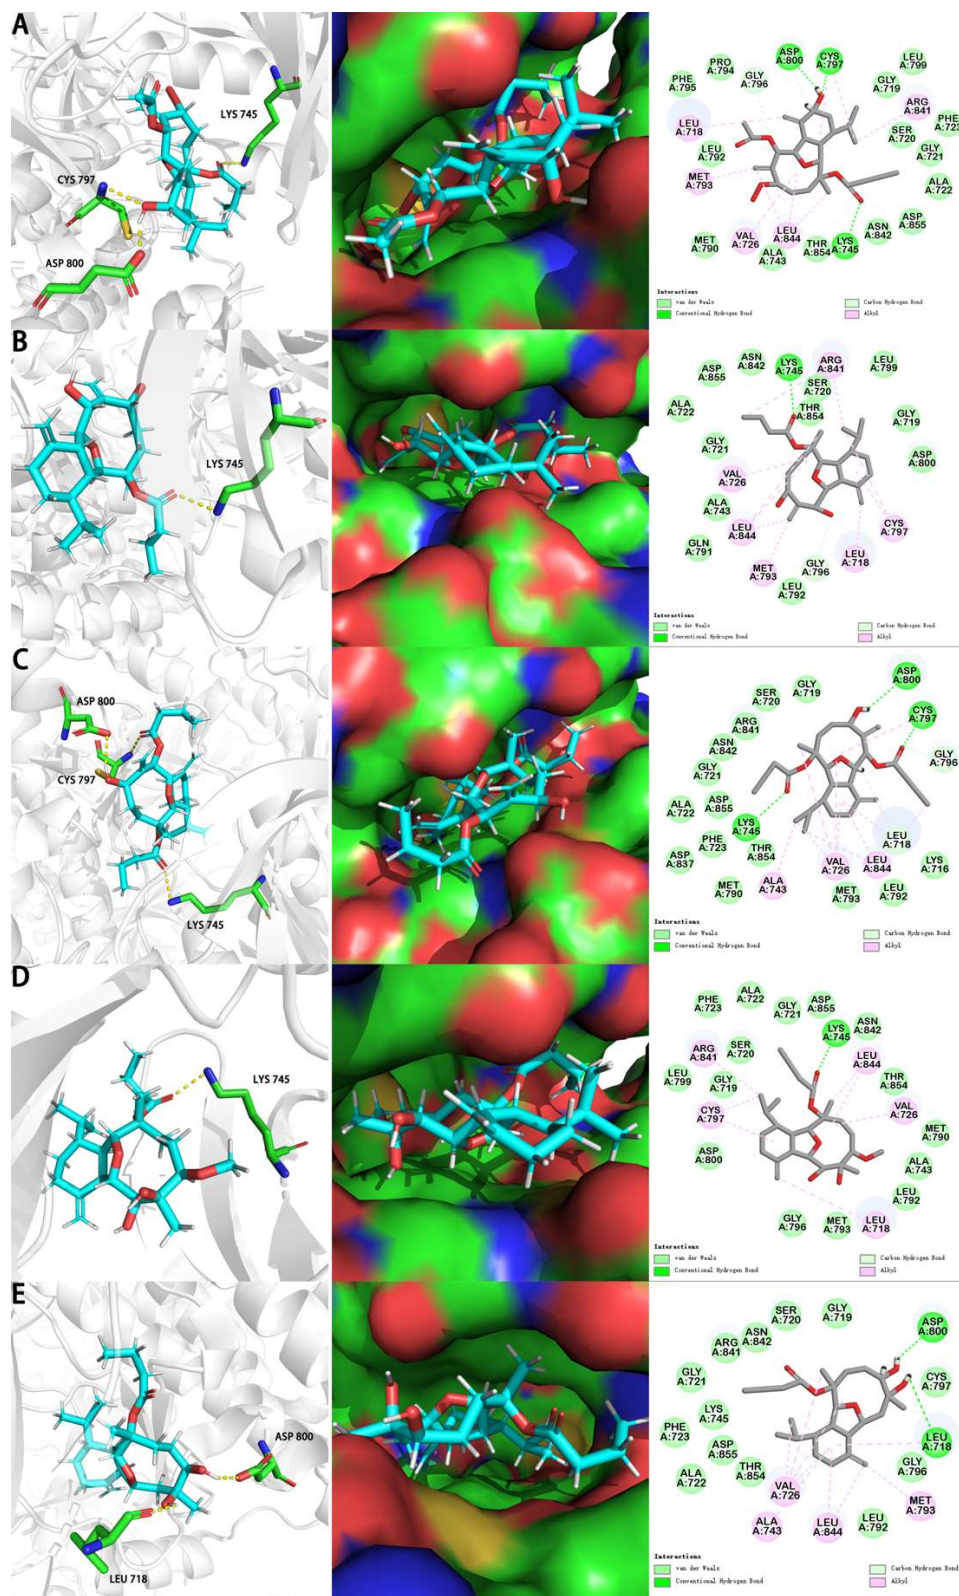

**Figure S31.** In silico binding mode of compounds **2–6** at EGFR kinase crystal structure 5X2A.
